# Supplementary material for: Habitat restoration opportunities, climatic niche contraction, and conservation biogeography in California's San Joaquin Desert
Source: PLoS One. 2019 Jan 15;14(1):e0210766. doi: 10.1371/journal.pone.0210766 (PMC6333358; doi:10.1371/journal.pone.0210766)
Supplement: S1 Table — List includes 42 species with occurrence records that fall within the boundary of the San Joaquin Desert (sensu Germano et al., 2011). SSC indicates a California species of special concern. (XLSX) [file pone.0210766.s002.xlsx]

## Sheet: Sheet1
S1 Table. Threatened, endangered, extinct, and extirpated species of the San Joaquin Desert. List includes 42 species with occurrence records that fall within the boundary of the San Joaquin Desert (sensu Germano et al., 2011). SSC indicates a California species of special concern.
Threatened and Endangered Species	Fed. Status	CA Status	Persistence
Sacramento perch, Archoplites interruptus	None	SSC	Extirpated
Gray wolf, Canis lupus	Endangered	Endangered	Extirpated
Western yellow-billed cuckoo, Coccyzus americanus occidentalis	Threatened	Endangered	Extirpated
Southwestern willow flycatcher, Empidonax traillii extimus	Endangered	Endangered	Extirpated
California condor, Gymnogyps californianus	Endangered	Endangered	Extirpated
Thicktail chub, Siphatales crassicauda	None	None	Extinct
California grizzly bear, Ursus arctos californicus	None	None	Extinct
California tiger salamander, Ambystoma californiense	Threatened	Threatened	Extant
Nelson’s antelope squirrel, Ammospermophilus nelsoni	None	Threatened	Extant
Bakersfield saltbush, Atriplex tularensis	None	Endangered	Extant
Conservancy fairy shrimp, Branchinecta conservatio	Endangered	None	Extant
Longhorn fairy Shrimp, Branchinecta longiantenna	Endangered	None	Extant
Vernal pool fairy shrim, Branchinecta lynchi	Threatened	None	Extant
Swainson's hawk, Buteo swainsoni	None	Threatened	Extant
San Benito evening primrose, Camissonia benitensis	Threatened	None	Extant
California jewelflower, Caulanthus californicus	Endangered	Endangered	Extant
Western Snowy Plover, Charadrius alexandrinus nivosus	Threatened	None	Extant
Palmate Salty Bird's-Beak, Chloropyron palmatum	Endangered	Endangered	Extant
Valley elderberry longhorn beetle, Desmocerus californicus dimorphus	Threatened	None	Extant
Giant kangaroo rat, Dipodomys ingens	Endangered	Endangered	Extant
Fresno kangaroo rat, Dipodomys nitratoides exilis	Endangered	Endangered	Unknown
Tipton kangaroo rat, Dipodomys nitratoides nitratoides	Endangered	Endangered	Extant
Kern mallow, Eremalche kernensis	Endangered	None	Extant
Delta button celery, Eryngium racemosum	None	Endangered	Extant
Hoover’s spurge, Euphorbia hooveri	Threatened	None	Extant
Kern primrose sphinx moth, Euproserpinus euterpe	Threatened	None	Extant
Blunt-nosed leopard lizard, Gambelia sila	Endangered	Endangered	Extant
Greater sandhill crane, Grus canadensis tabida	None	Threatened	Extant
Bald eagle, Haliaeetus leucocephalus	None	Endangered	Extant
Vernal pool tadpole shrimp, Lepidurus packardi	Endangered	None	Extant
San Joaquin woollythreads, Monolopia congdonii	Endangered	None	Extant
Colusa grass, Neostapfia colusana	Threatened	Endangered	Extant
San Joaquin Valley woodrat, Neotoma fuscipes riparia	Endangered	SSC	Extant
Bakersfield cactus, Opuntia basilaris var. treleasei	Endangered	Endangered	Extant
San Joaquin adobe sunburst, Pseudobahia peirsonii	Threatened	Endangered	Extant
California red-legged frog, Rana draytonii	Threatened	SSC	Extant
Bank swallow, Riparia riparia	None	Threatened	Extant
Buena Vista Lake ornate shrew, Sorex ornatus relictus	Endangered	SSC	Extant
Riparian brush rabbit, Sylvilagus bachmani riparius	Endangered	Endangered	Extant
Giant garter snake, Thamnophis gigas	Threatened	Threatened	Extant
Least Bell's vireo, Vireo bellii pusillus	Endangered	Endangered	Extant
San Joaquin kit fox, Vulpes macrotis mutica	Endangered	Threatened	Extant
